# Supplementary material for: Ballistic projectile hazard of major explosions and paroxysms at Stromboli (Italy) with uncertainty quantification: 1. Mapping method and data analysis
Source: Copernicus journal article supplement (doi:10.5194/egusphere-2025-6539), 2026-01-12
Supplement: Supplementary file 1 [file SupportingTableS1.xlsx]

## Sheet: Sheet1
				Radius [m]				Direction (bisector) [deg]			Half Width [deg]			Uncertainty	Sciara
				Circle	sector1	sector2	sector3	sector1	sector2	sector3	sector1	sector2	sector3	Class
1	1972	12	4	250	900	0	0	48	0	0	30	0	0	High	ND
2	1974	9	19
3	1988	8	30
4	1989	3	26	250	1000	600	0	65	133	0	25	35	0	High	ND
5	1990	6	18
6	1992	9	1	250	400	0	0	125	0	0	30	0	0	High	ND
7	1993	2	10
8	1993	10	16	250	600	600	0	57	135	0	15	45	0	Low	ND
9	1995	3	5	250	600	0	0	155	0	0	43	0	0	High	ND
10	1995	5	10
11	1996	2	16	250	500	0	0	175	0	0	33	0	0	High	ND
12	1996	6	1	500	1000	0	0	50	0	0	50	0	0	High	ND
13	1996	6	6	250	400	400	0	35	35	0	135	345	0	High	400
14	1996	9	4	500	1100	0	0	33	0	0	33	0	0	Low	500
15	1998	1	16	250	400	0	0	140	0	0	50	0	0	High	ND
16	1998	8	23	250	1000	600	0	45	125	0	23	62	0	Low	ND
17	1998	9	8	250	900	600	0	6	120	0	50	65	0	Low	900
18	1998	11	24	250	500	0	0	130	0	0	50	0	0	Low	ND
19	1999	8	25	250	500	400	0	55	135	0	15	52	0	Low	ND
20	2001	10	20	250	800	600	0	56	155	0	23	48	0	High	ND
21	2002	1	23	250	500	0	0	130	0	0	55	0	0	Low	ND
22	2002	7	24	250	500	400	0	100	163	0	18	20	0	High	ND
23	2005	8	5	250	600	0	0	153	0	0	24	0	0	High	ND
24	2008	2	29	250	400	0	0	0	0	0	27	0	0	High	400
25	2008	12	6	300	300	0	0	0	0	0	180	0	0	High	ND
26	2009	5	3	250	400	0	0	77	0	0	38	0	0	Low	250
27	2009	11	8	250	650	0	0	75	0	0	20	0	0	Low	ND
28	2009	11	24	350	500	0	0	92	0	0	60	0	0	Low	350
29	2010	1	10	250	700	0	0	88	0	0	57	0	0	Low	250
30	2010	1	21	250	400	0	0	180	0	0	50	0	0	Low	ND
31	2010	6	30
32	2011	7	5	250	400	0	0	118	0	0	12	0	0	High	ND
33	2012	2	15	250	350	0	0	135	0	0	35	0	0	High	250
34	2012	3	6
35	2017	7	26	250	500	350	0	47	142	0	22	35	0	High	250
36	2017	10	23	250	400	0	0	160	0	0	23	0	0	High	250
37	2017	11	1	250	400	0	0	164	0	0	45	0	0	High	250
38	2017	12	1	250	400	0	0	150	0	0	52	0	0	High	ND
39	2018	3	7	250	400	0	0	320	0	0	40	0	0	High	400
40	2019	6	25	250	750	550	0	125	195	0	20	45	0	Low	ND
41	2019	8	29
42	2020	7	19	250	1200	600	500	85	35	140	14	34	43	Low	ND
43	2020	11	10	250	400	300	0	320	130	0	47	30	0	High	400
44	2020	11	16	250	300	0	0	130	0	0	21	0	0	High	250
45	2021	3	1	250	400	400	0	130	310	0	35	44	0	High	400
46	2021	7	14	250	400	400	0	130	310	0	35	44	0	High	400
47	2021	7	28	250	300	0	0	130	0	0	21	0	0	High	250
48	2021	8	1	250	300	0	0	130	0	0	21	0	0	High	250
49	2021	10	6	250	600	400	0	57	122	0	15	35	0	Low	ND
50	2022	5	13	250	900	700	500	106	74	134	6	20	20	Low	ND
51	2022	7	25	250	800	0	0	320	0	0	35	0	0	High	800
