# Supplementary material for: Ballistic projectile hazard of major explosions and paroxysms at Stromboli (Italy) with uncertainty quantification: 1. Mapping method and data analysis
Source: Copernicus journal article supplement (doi:10.5194/egusphere-2025-6539), 2026-01-12
Supplement: Supplementary file 2 [file SupportingTableS2.xlsx]

## Sheet: Sheet1
				Radius [m]				Direction (bisector) [deg]			Half Width [deg]			Uncertainty	Sciara
				Circle	sector1	sector2	sector3	sector1	sector2	sector3	sector1	sector2	sector3	Class
1	1879	2	5
2	1879	6	8	500	1200+	0	0	125	0	0	41	0	0	High (P)	ND
3	1882	3	13	500	1200+	0	0	307	0	0	56	0	0	High (P)	1200+
4	1882	11	18	500	2000	1200+	0	246	192	0	8	56	0	High (P)	ND
5	1883	3	16
6	1887	1	31
7	1887	3	31
8	1887	11	18
9	1891	6	24	500	2000	1200+	0	12	40	0	6	32	0	High (P)	ND
10	1891	8	31
11	1906	7	15	500	1700	0	0	112	0	0	19	0	0	High (P)	ND
12	1906	7	16	500	1500	1200+	0	353	43	0	13	40	0	High (P)	ND
13	1907	4	13
14	1907	4	27
15	1912	7	27
16	1915	11	13	500	1200+	900	500+	235	50	316	38	58	128	High (P)	500+
17	1915	11	26
18	1916	7	4	700	1400	0	0	296	0	0	62	0	0	Low (P)	1400
19	1919	5	22	500	2500	2000	1900	63	250	22	20	13	23	Low (P)	500
20	1921	6	27	500	1200+	800	500+	55	168	306	22	90	48	High (P)	500+
21	1924	3	28	500	1200+	1200+	0	298	60	0	49	25	0	High (P)	1200+
22	1930	9	11	500	2200	1900	1000	262	10	50	27	20	20	Low (P)	500
23	1930	10	22	500	1200+	500+	0	115	315	0	36	34	0	High (P)	500+
24	1931	4	23
25	1934	2	2	500	1400	500+	0	40	325	0	20	41	0	High (P)	500+
26	1935	7	21	500	1400	500+	0	14	337	0	25	34	0	High (P)	500+
27	1936	1	31	700	2000	1200+	0	248	319	0	8	62	0	High (P)	1200+
28	1937	1	21
29	1937	12	14
30	1938	5	22
31	1941	8	22	500	1200	500+	0	52	337	0	27	55	0	High (P)	500+
32	1943	12	3
33	1944	1	25
34	1944	8	20	500	1200+	0	0	125	0	0	30	0	0	High (P)	ND
35	1959	5	19	500	1200+	500+	0	117	316	0	30	34	0	High (P)	500+
36	1959	7	11	500	1400	1200	800	183	292	120	37	63	25	Low (P)	1200
37	2003	4	5	500	2100	1400	0	236	27	0	12	22	0	Low (P)	500
38	2007	3	15	500	1700	700	0	45	182	0	40	82	0	Low (P)	500
39	2019	7	3	900	1800	1200	0	265	325	0	30	32	0	Low (P)	1200
40	2019	8	28	700	1600	0	0	40	0	0	45	0	0	Low (P)	700
