# Supplementary material for: Ballistic projectile hazard of major explosions and paroxysms at Stromboli (Italy) with uncertainty quantification: 1. Mapping method and data analysis
Source: Copernicus journal article supplement (doi:10.5194/egusphere-2025-6539), 2026-01-12
Supplement: Supplementary file 3 [file SupportingTableS3.xlsx]

## Sheet: Foglio1
	Year	Month	Day	Type
	1879	2	4	X
	1879	2	5	XX
	1879	6	8	XX
	1881	10	18	X?
	1882	1	30	X
	1882	3	13	XX
	1882	4	25	X?
	1882	11	17	X?
	1882	11	18	XX
	1882	11	29	X?
	1883	2	8	X?
	1883	2	9	X
	1883	3	16	XX
	1883	7	3	X?
	1885	6	28	X?
	1886	1	22	X?
	1887	1	31	XX
	1887	3	31	XX
	1887	11	18	XX
	1888	10	23	X
	1888	11	5	X?
	1891	6	24	XX
	1891	6	30	X
	1891	8	31	XX
	1892	5	11	X?
	1893	1	30	X?
	1893	8	11	X?
	1895	3	29	X
	1896	7	13	X
	1897	7	17	X
	1897	7	18	X?
	1898	8	24	X?
	1898	10	20	X?
	1898	10	25	X
	1899	11	10	X?
	1900	4	10	X
	1900	5	20	X
	1900	8	4	X
	1900	8	22	X
	1900	9	19	X?
	1900	10	19	X
	1901	3	8	X
	1901	9	22	X
	1901	12	29	X
	1902	11	13	X
	1902	11	23	X
	1903	1	22	X
	1903	3	9	X
	1903	11	11	X?
	1904	3	19	X
	1904	8	22	X?
	1905	2	25	X
	1905	3	15	X?
	1905	4	7	X?
	1905	4	16	X
	1905	9	27	X?
	1906	1	19	X?
	1906	7	11	X?
	1906	7	15	XX
	1906	7	16	XX
	1907	1	11	X
	1907	4	13	XX
	1907	4	27	XX
	1907	5	14	X?
	1907	5	20	X
	1912	7	27	XX
	1912	8	7	X?
	1914	5	30	X?
	1915	11	13	XX
	1915	11	26	XX
	1915	12	10	X
	1916	1	5	X
	1916	7	2	X
	1916	7	4	XX
	1916	7	11	X
	1916	7	22	X?
	1916	8	26	X
	1919	5	22	XX
	1921	6	4	X?
	1921	6	16	X?
	1921	6	22	X?
	1921	6	27	XX
	1922	8	20	X?
	1923	12	15	X?
	1924	3	28	XX
	1924	3	31	X?
	1930	2	3	X?
	1930	9	11	XX
	1930	10	22	XX
	1931	4	23	XX
	1931	7	7	X?
	1932	6	3	X
	1934	2	2	XX
	1934	8	21	X
	1935	2	22	X?
	1935	2	23	X?
	1935	7	21	XX
	1936	1	31	XX
	1936	5	12	X
	1936	8	22	X
	1936	10	26	X
	1937	1	6	X
	1937	1	10	X?
	1937	1	21	XX
	1937	12	14	XX
	1938	5	8	X
	1938	5	22	XX
	1938	6	1	X?
	1939	1	4	X?
	1939	2	12	X?
	1941	8	22	XX
	1943	12	3	XX
	1944	1	25	XX
	1944	2	24	X?
	1944	6	15	X?
	1944	8	20	XX
	1944	9	12	X
	1949	6	6	X?
	1950	10	20	X
	1952	6	7	X?
	1954	2	1	X?
	1959	5	19	XX
	1959	7	11	XX
	1959	9	6	X
	1959	9	14	X?
	1972	12	4	X
	1972	12	14	X?
	1974	9	19	X
	1975	11	4	X?
	1975	11	5	X?
	1985	6	27	X?
	1985	12	6	X?
	1986	4	23	X?
	1988	8	30	X
	1989	3	7	X?
	1989	3	20	X?
	1989	3	26	X
	1989	4	3	X?
	1990	6	18	X
	1992	7	20	X?
	1992	9	1	X
	1993	2	10	X
	1993	10	16	X
	1994	6	4	X?
	1995	3	5	X
	1995	5	10	X
	1996	2	16	X
	1996	6	1	X
	1996	6	6	X
	1996	9	4	X
	1998	1	16	X
	1998	8	23	X
	1998	9	8	X
	1998	11	24	X
	1998	12	26	X?
	1998	12	28	X?
	1999	4	9	X?
	1999	8	25	X
	1999	10	10	X?
	1999	11	16	X?
	1999	12	22	X?
	2000	7	4	X?
	2000	9	6	X?
	2001	10	20	X
	2002	1	23	X
	2002	7	24	X
	2003	4	5	XX
	2004	3	3	X?
	2005	8	5	X
	2006	12	15	X?
	2007	3	15	XX
	2008	2	29	X
	2008	12	6	X
	2009	5	3	X
	2009	11	8	X
	2009	11	24	X
	2010	1	10	X
	2010	1	21	X
	2010	6	25	X?
	2010	6	30	X
	2010	12	19	X?
	2011	6	20	X?
	2011	7	5	X
	2011	7	10	X?
	2011	9	5	X?
	2012	2	15	X
	2012	3	6	X
	2012	11	22	X?
	2017	7	26	X
	2017	10	23	X
	2017	11	1	X
	2017	12	1	X
	2018	3	7	X
	2018	3	18	X?
	2018	4	24	X?
	2018	4	26	X?
	2019	6	25	X
	2019	7	3	XX
	2019	8	28	XX
	2019	8	29	X
	2020	7	19	X
	2020	11	10	X
	2020	11	16	X
	2021	3	1	X
	2021	7	14	X
	2021	7	28	X
	2021	8	1	X
	2021	9	11	X?
	2021	10	6	X
	2022	5	13	X
	2022	5	25	X?
	2022	7	25	X
	2022	9	29	X?
	2023	4	7	X?
